# Supplementary material for: Distribution and Assembly Processes of Soil Fungal Communities along an Altitudinal Gradient in Tibetan Plateau
Source: MDPI journal article supplement (doi:10.3390/jof7121082), 2021-12-16
Supplement: s1 [file s1]

Supplementary

**Table S1.** Characteristics of the study sites on the Qinghai-Tibet Plateau.

| Altitude/m | Longitude  | Latitude   | Slope | Soil Type                | Vegetation Types     |
|------------|------------|------------|-------|--------------------------|----------------------|
| 889        | 98°52'4"E  | 26°12'39"N | Yes   | Brown soil               | Shrubs, herbs        |
| 1297       | 98°50'1"E  | 27°23'7"N  | Yes   | Brown soil               | Trees, shrubs, herbs |
| 1660       | 98°30'2"E  | 28°7'20"N  | Yes   | Brown soil               | Trees, shrubs, herbs |
| 1789       | 98°27'4"E  | 28°28'22"N | Yes   | Calcareous cinnamon soil | Trees, shrubs, herbs |
| 1812       | 98°29'2"E  | 28°16'50"N | Yes   | Calcareous cinnamon soil | Trees, shrubs, herbs |
| 3350       | 98°48'40"E | 28°6'33"N  | Yes   | Calcareous cinnamon soil | Trees, shrubs, herbs |
| 3837       | 98°45'29"E | 28°4'29"N  | Yes   | Frozen embryonic soil    | Trees, shrubs, herbs |

**Table S2.** Pearson correlation analysis among soil physio chemical parameters and soil layers along with elevation gradients.

|                                 | pH        | EC       | SOM     | TN      | AN      | NH <sub>4</sub> <sup>+</sup> -N | NO <sub>3</sub> <sup>-</sup> -N | TP      | AP      | 18s Gene Abundance |
|---------------------------------|-----------|----------|---------|---------|---------|---------------------------------|---------------------------------|---------|---------|--------------------|
| pH                              | 1         |          |         |         |         |                                 |                                 |         |         |                    |
| EC                              | 0.602**   | 1        |         |         |         |                                 |                                 |         |         |                    |
| SOM                             | -0.496**  | -0.522** | 1       |         |         |                                 |                                 |         |         |                    |
| TN                              | -0.445**  | -0.118   | 0.593** | 1       |         |                                 |                                 |         |         |                    |
| AN                              | -0.572**  | -0.178   | 0.372** | 0.615** | 1       |                                 |                                 |         |         |                    |
| NH <sub>4</sub> <sup>+</sup> -N | -0.275*   | 0.085    | 0.422** | 0.614** | 0.283*  | 1                               |                                 |         |         |                    |
| NO <sub>3</sub> <sup>-</sup> -N | 0.065     | 0.249*   | -0.045  | 0-0.152 | -0.081  | 0.236                           | 1                               |         |         |                    |
| TP                              | -0.404**  | -0.248   | 0.295*  | 0.463** | 0.399** | 0.065                           | -0.152                          | 1       |         |                    |
| AP                              | -0.0584** | -0.239   | 0.311*  | 0.318*  | 0.426** | 0.512**                         | 0.363**                         | 0.324** | 1       |                    |
| 18s gene abundance              | -0.084    | 0.196    | 0.005   | 0.413** | 0.308*  | 0.547**                         | -0.008                          | 0.109   | 0.387** | 1                  |

Pearson correlation analysis among soil samples. Note: EC, Election Conductivity; SOM, Soil Organic Matter; TN, Total Nitrogen; AN, Alkaline Nitrogen; TP, Total Phosphorus, AP, Available Phosphorus. (\* $P < 0.05$ , \*\* $P < 0.001$ ,  $n = 6$ ).

**Table S3.** Fungal community alpha diversity analysis performed by One-Way ANOVA.

| Samples | The Diversity Index          |                              |                              |                         |                            |                             |
|---------|------------------------------|------------------------------|------------------------------|-------------------------|----------------------------|-----------------------------|
|         | SR                           | ACE                          | CHAO1                        | Shannon                 | Simpson                    | PD                          |
| SL889   | 161 ± 55.139 <sup>cA</sup>   | 173 ± 48.72 <sup>cA</sup>    | 176 ± 48.30 <sup>cA</sup>    | 4 ± 0.38 <sup>bA</sup>  | 1 ± 0.08 <sup>bA</sup>     | 47 ± 14.29 <sup>cA</sup>    |
| ML889   | 208 ± 29.194 <sup>bA</sup>   | 238 ± 38.08 <sup>bA</sup>    | 236 ± 38.42 <sup>bA</sup>    | 2 ± 0.37 <sup>cB</sup>  | 0.42 ± 0.11 <sup>cB</sup>  | 51 ± 5.95 <sup>cA</sup>     |
| DL889   | 248 ± 129.44 <sup>abA</sup>  | 255 ± 133.96 <sup>abcA</sup> | 256 ± 137.77 <sup>abcA</sup> | 4 ± 0.4 <sup>abA</sup>  | 1 ± 0.03 <sup>aA</sup>     | 78 ± 42.79 <sup>abA</sup>   |
| SL1297  | 620 ± 320.32 <sup>bA</sup>   | 681 ± 377.18 <sup>bA</sup>   | 684 ± 370.27 <sup>bA</sup>   | 6 ± 1.39 <sup>aAB</sup> | 1 ± 0.16 <sup>abA</sup>    | 135 ± 40.47 <sup>bA</sup>   |
| ML1297  | 415 ± 144.60 <sup>abAB</sup> | 432 ± 145.72 <sup>abAB</sup> | 447 ± 166.39 <sup>abAB</sup> | 7 ± 0.34 <sup>aA</sup>  | 1 ± 0.001 <sup>aA</sup>    | 122 ± 28.16 <sup>aA</sup>   |
| DL1297  | 128 ± 158.04 <sup>bcB</sup>  | 132 ± 164.01 <sup>bcB</sup>  | 134 ± 168.45 <sup>bcB</sup>  | 2 ± 2.98 <sup>cB</sup>  | 0.3 ± 0.5 <sup>bA</sup>    | 35 ± 37.18 <sup>bcB</sup>   |
| SL1660  | 929 ± 131.03 <sup>aA</sup>   | 1094 ± 151.28 <sup>aA</sup>  | 1092 ± 150.07 <sup>aA</sup>  | 7 ± 1.29 <sup>aA</sup>  | 1 ± 0.09 <sup>aA</sup>     | 167 ± 17.55 <sup>bA</sup>   |
| ML1660  | 172 ± 33.83 <sup>bB</sup>    | 179 ± 31.36 <sup>bB</sup>    | 182 ± 28.39 <sup>bB</sup>    | 5 ± 0.83 <sup>abA</sup> | 1 ± 0.09 <sup>abA</sup>    | 57 ± 10.17 <sup>cB</sup>    |
| DL1660  | 244 ± 46.03 <sup>abB</sup>   | 254 ± 42.53 <sup>abcB</sup>  | 255 ± 46.34 <sup>abcB</sup>  | 6 ± 0.51 <sup>aA</sup>  | 1 ± 0.01 <sup>aA</sup>     | 69 ± 8.08 <sup>abB</sup>    |
| SL1789  | 147 ± 38.89 <sup>cA</sup>    | 171 ± 31.89 <sup>cA</sup>    | 176 ± 25.28 <sup>cA</sup>    | 1 ± 0.81 <sup>cA</sup>  | 0.32 ± 0.2 <sup>cA</sup>   | 39 ± 11.52 <sup>cA</sup>    |
| ML1789  | 204 ± 224.29 <sup>bA</sup>   | 209 ± 222.79 <sup>bA</sup>   | 209 ± 223.92 <sup>bA</sup>   | 3 ± 2.77 <sup>bcA</sup> | 1 ± 0.5 <sup>bcA</sup>     | 64 ± 56.06 <sup>bcA</sup>   |
| DL1789  | 78 ± 18.34 <sup>cA</sup>     | 86 ± 28.68 <sup>cA</sup>     | 85 ± 28.19 <sup>cA</sup>     | 3 ± 0.73 <sup>bcA</sup> | 1 ± 0.15 <sup>abA</sup>    | 17 ± 1.53 <sup>cA</sup>     |
| SL1812  | 577 ± 10.97 <sup>bA</sup>    | 670 ± 27.67 <sup>bA</sup>    | 669 ± 30.03 <sup>bA</sup>    | 6 ± 0.32 <sup>aA</sup>  | 1 ± 0.01 <sup>aA</sup>     | 136 ± 1.82 <sup>bA</sup>    |
| ML1812  | 561 ± 56.15 <sup>aA</sup>    | 612 ± 66.18 <sup>aA</sup>    | 615 ± 66.35 <sup>aA</sup>    | 6 ± 0.17 <sup>aA</sup>  | 1 ± 0.004 <sup>abA</sup>   | 139 ± 5.59 <sup>aA</sup>    |
| DL1812  | 151 ± 45.39 <sup>bcB</sup>   | 157 ± 47.04 <sup>bcB</sup>   | 155 ± 45.96 <sup>bcB</sup>   | 4 ± 0.24 <sup>abB</sup> | 8.87 ± 0.01 <sup>bbB</sup> | 65 ± 25.52 <sup>abB</sup>   |
| SL3350  | 554 ± 14.47 <sup>bA</sup>    | 618 ± 35.57 <sup>bA</sup>    | 616 ± 39.74 <sup>bA</sup>    | 6 ± 0.08 <sup>aA</sup>  | 1 ± 0.01 <sup>aA</sup>     | 147 ± 7.97 <sup>bA</sup>    |
| ML3350  | 499 ± 197.24 <sup>aA</sup>   | 526 ± 213.42 <sup>aAB</sup>  | 527 ± 213.82 <sup>aAB</sup>  | 6 ± 0.36 <sup>aA</sup>  | 1 ± 0.01 <sup>abA</sup>    | 117 ± 38.71 <sup>abAB</sup> |
| DL3350  | 250 ± 48.91 <sup>abB</sup>   | 290 ± 47.88 <sup>abB</sup>   | 288 ± 53.20 <sup>abB</sup>   | 3 ± 0.64 <sup>bcB</sup> | 1 ± 0.08 <sup>abB</sup>    | 72 ± 10.09 <sup>abB</sup>   |
| SL3837  | 958 ± 76.89 <sup>aA</sup>    | 1115 ± 74.09 <sup>aA</sup>   | 1113 ± 69.48 <sup>aA</sup>   | 7 ± 0.33 <sup>aA</sup>  | 1 ± 0.01 <sup>aA</sup>     | 212 ± 6.23 <sup>aA</sup>    |
| ML3837  | 406 ± 143.51 <sup>abB</sup>  | 422 ± 151.84 <sup>abB</sup>  | 430 ± 159.59 <sup>abB</sup>  | 6 ± 0.65 <sup>abB</sup> | 1 ± 0.04 <sup>abA</sup>    | 115 ± 24.21 <sup>abB</sup>  |
| DL3837  | 354 ± 53.68 <sup>abB</sup>   | 366 ± 58.31 <sup>abB</sup>   | 375 ± 61.60 <sup>abB</sup>   | 6 ± 0.08 <sup>abB</sup> | 1 ± 0.004 <sup>aA</sup>    | 103 ± 3.94 <sup>abB</sup>   |

SL: Surface Layer, ML: Middle Layer, DL: Deeper Layer, OTU: Operational Taxonomic Units, ACE: Abundance-based Coverage Estimator. Note: Values are means ± standard deviation ( $n = 3$ ), and the superscripts of different upper-case letters the same column indicated significant difference among soil layers at each altitude while superscripts of different small letter denoted significant difference among all altitudes for each soil layer (Duncan's test,  $P < 0.05$ ) among soil samples.

**Table S4.** The Mantel test results showing relationship between fungal diversity indices and environmental and geographical distance for all pairwise samples using mantel test.

| Variables |            | Surface layer |       | Middle layer |       | Deeper layers |       |
|-----------|------------|---------------|-------|--------------|-------|---------------|-------|
|           |            | $r$           | $p$   | $r$          | $p$   | $r$           | $p$   |
| E. F      | Bray-Crust | 0.542         | 0.001 | 0.405        | 0.001 | 0.547         | 0.001 |
|           | w.UniFrac  | 0.235         | 0.001 | 0.234        | 0.001 | 0.407         | 0.001 |
|           | βMNTD      | 0.51          | 0.001 | 0.572        | 0.001 | 0.478         | 0.001 |
|           | βNTI       | −0.345        | 0.001 | −0.196       | 0.001 | −0.341        | 0.001 |
| G. D      | Bray-Crust | 0.395         | 0.001 | 0.386        | 0.001 | 0.275         | 0.001 |
|           | w.UniFrac  | 0.443         | 0.001 | 0.646        | 0.001 | 0.199         | 0.001 |
|           | βMNTD      | 0.425         | 0.001 | 0.324        | 0.001 | 0.244         | 0.001 |
|           | βNTI       | −0.291        | 0.001 | −0.328       | 0.001 | −0.273        | 0.001 |

" $r$ " shows the degree of relationship,  $n = 21$ . E.F; Environmental Factors, G.D; Geographic distance.

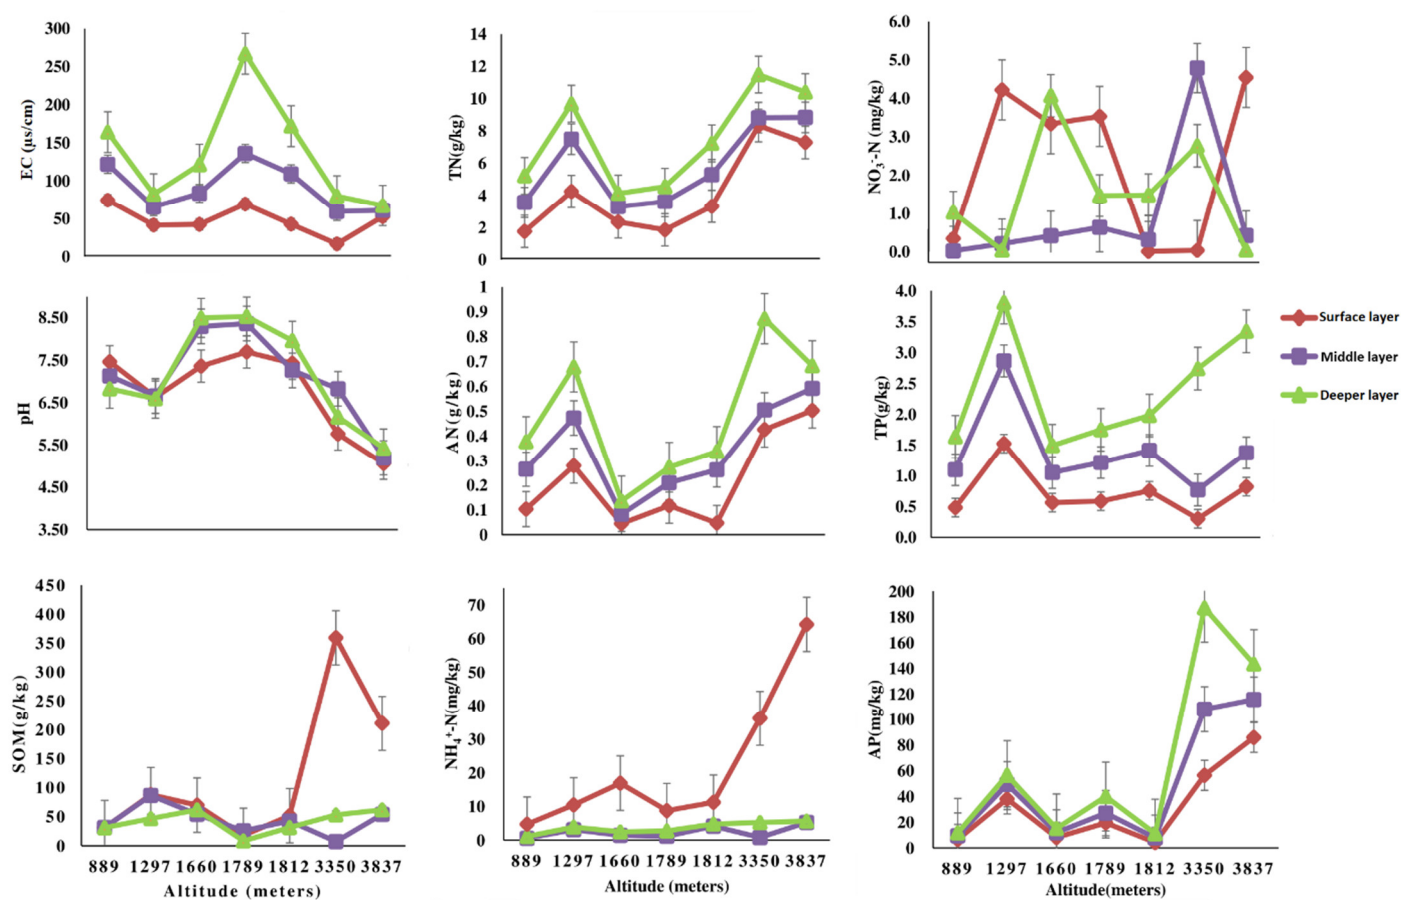

Figure S1. Soil physiochemical factors distributions along with elevational gradients.

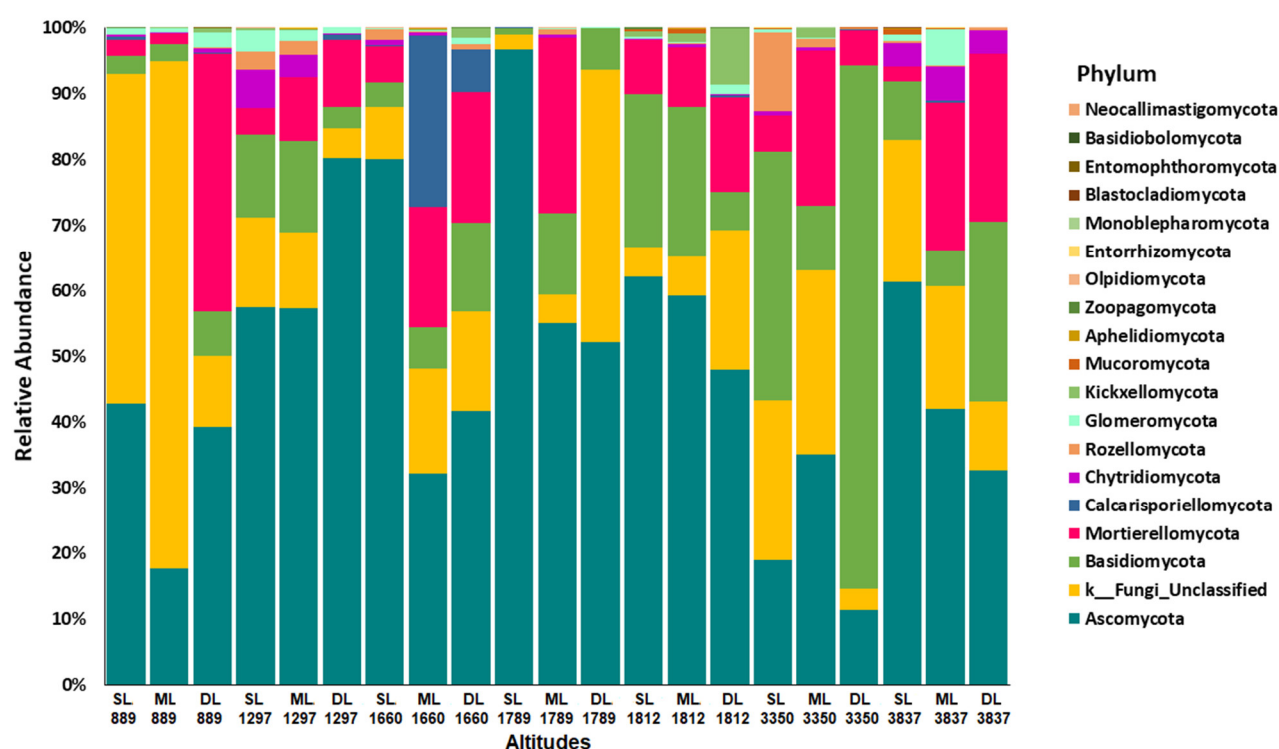

**Figure S2.** The relative abundance of fungal phyla along with elevation gradients and soil layers. SL: Surface Layer, ML: Middle Layer, DL: Deeper Layer.

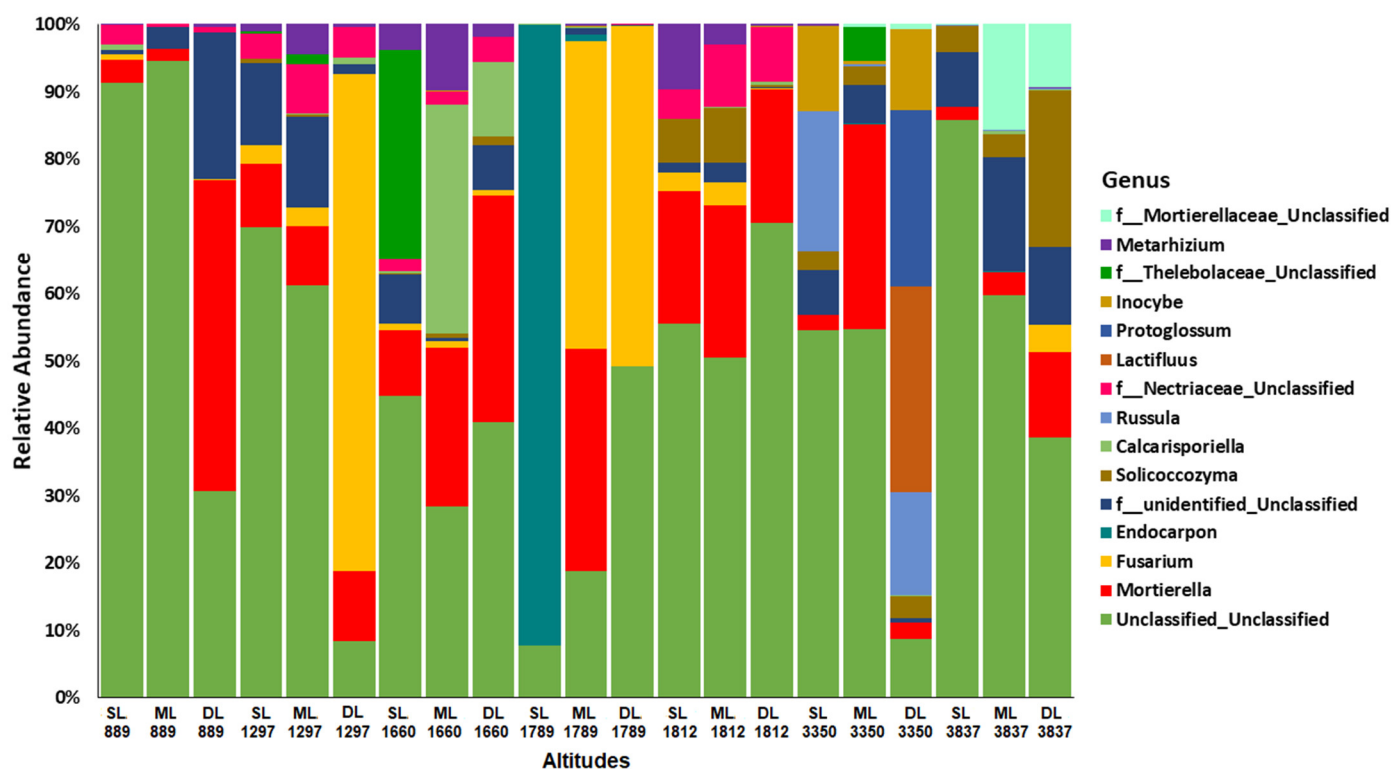

**Figure S3.** The relative abundance of top 15 fungal genera along with elevation gradients and soil layers.

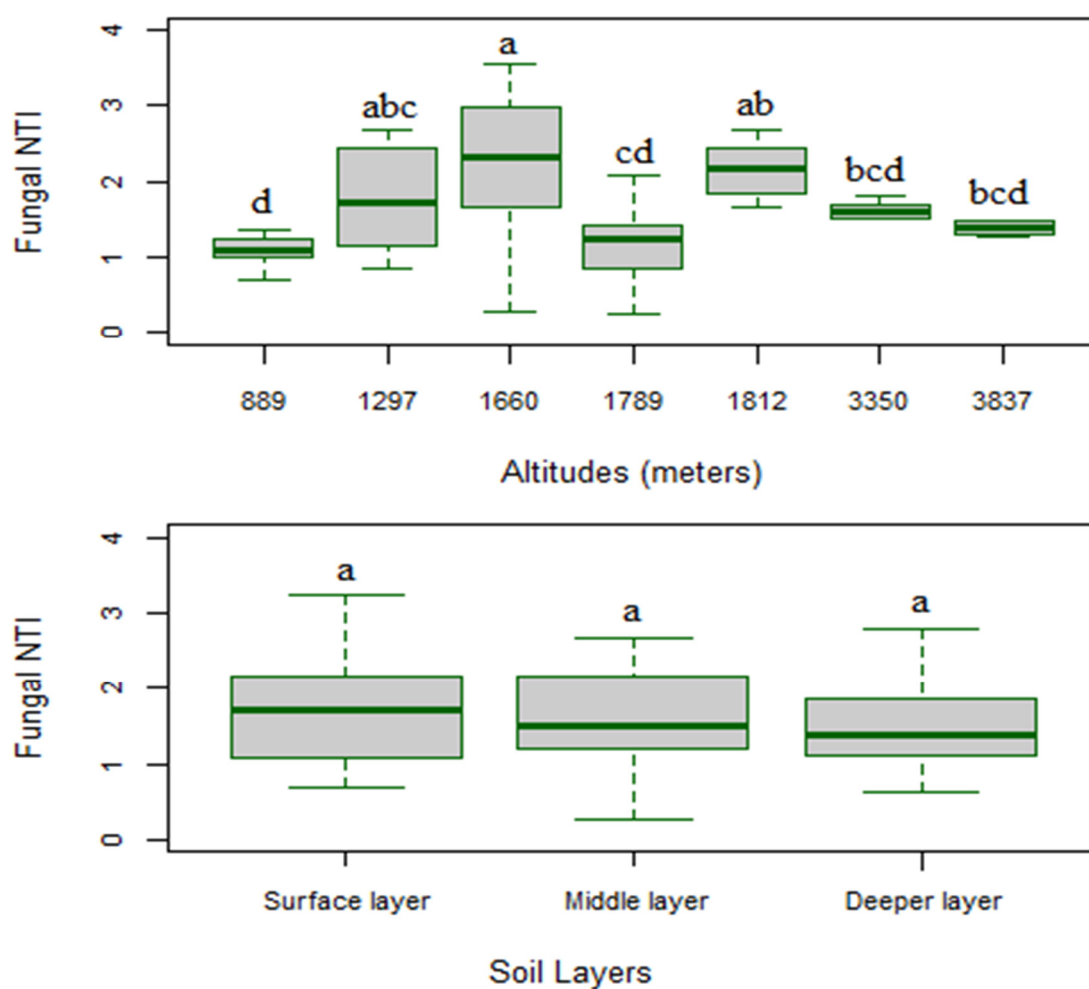

**Figure S4.** (A) Boxplot of Nearest Taxon Index (NTI) values of fungal communities along altitudinal gradients and (B) soil layers. The superscripts of different small letter denoted significant difference among all altitudes and soil layers (Duncan's test,  $P < 0.05$ ).

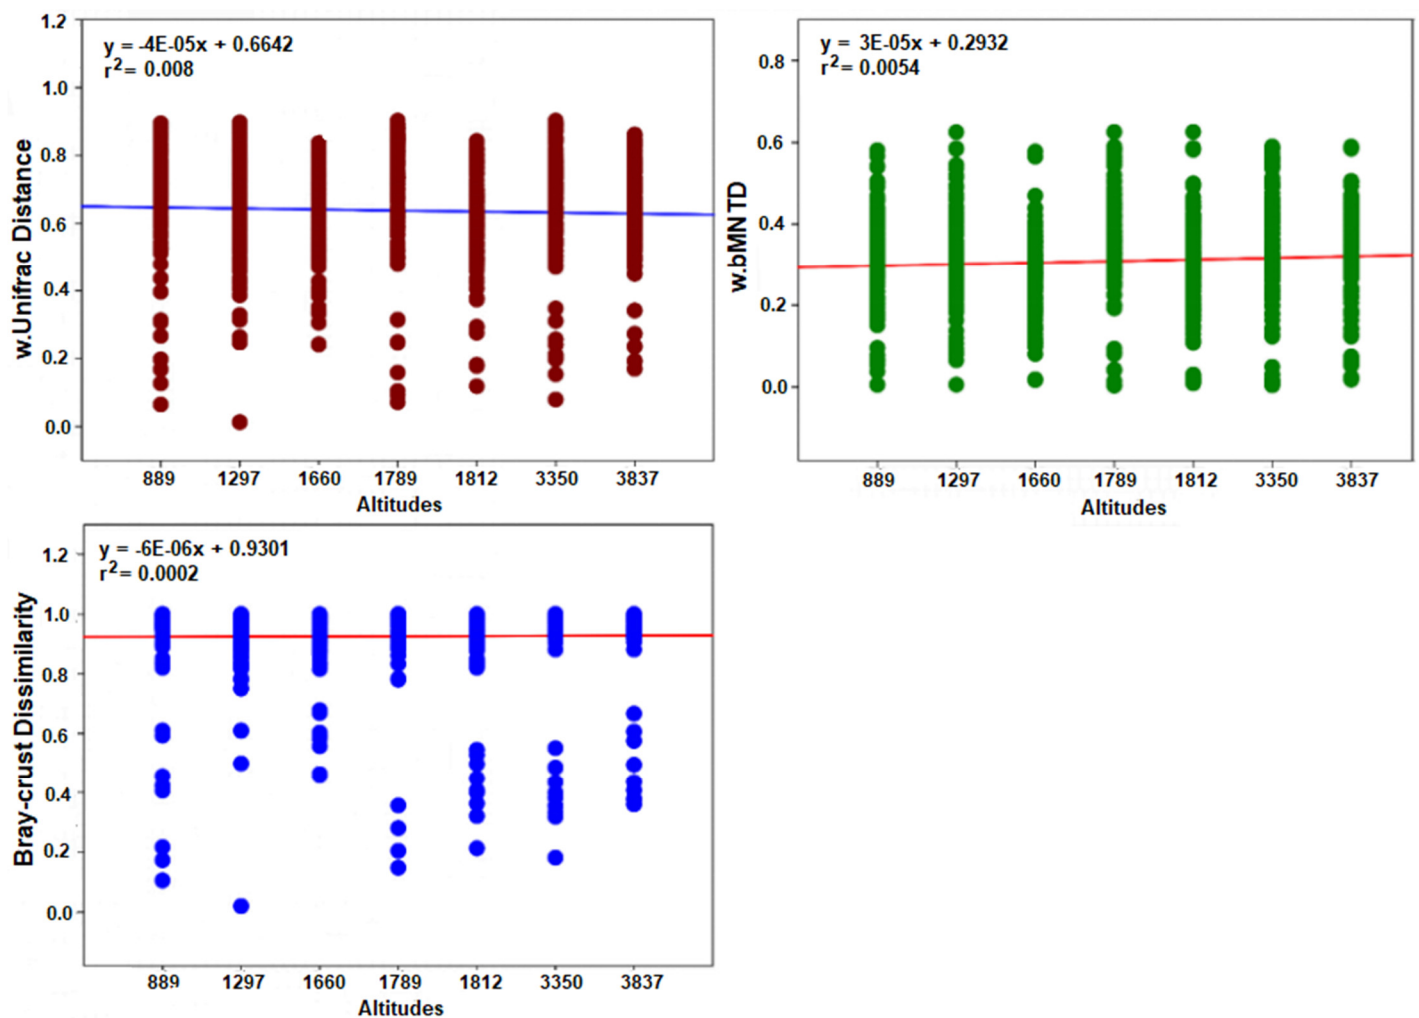

**Figure S5.** Linear regression analysis of fungal taxonomic and phylogenetic beta diversity indices among altitudinal gradients.

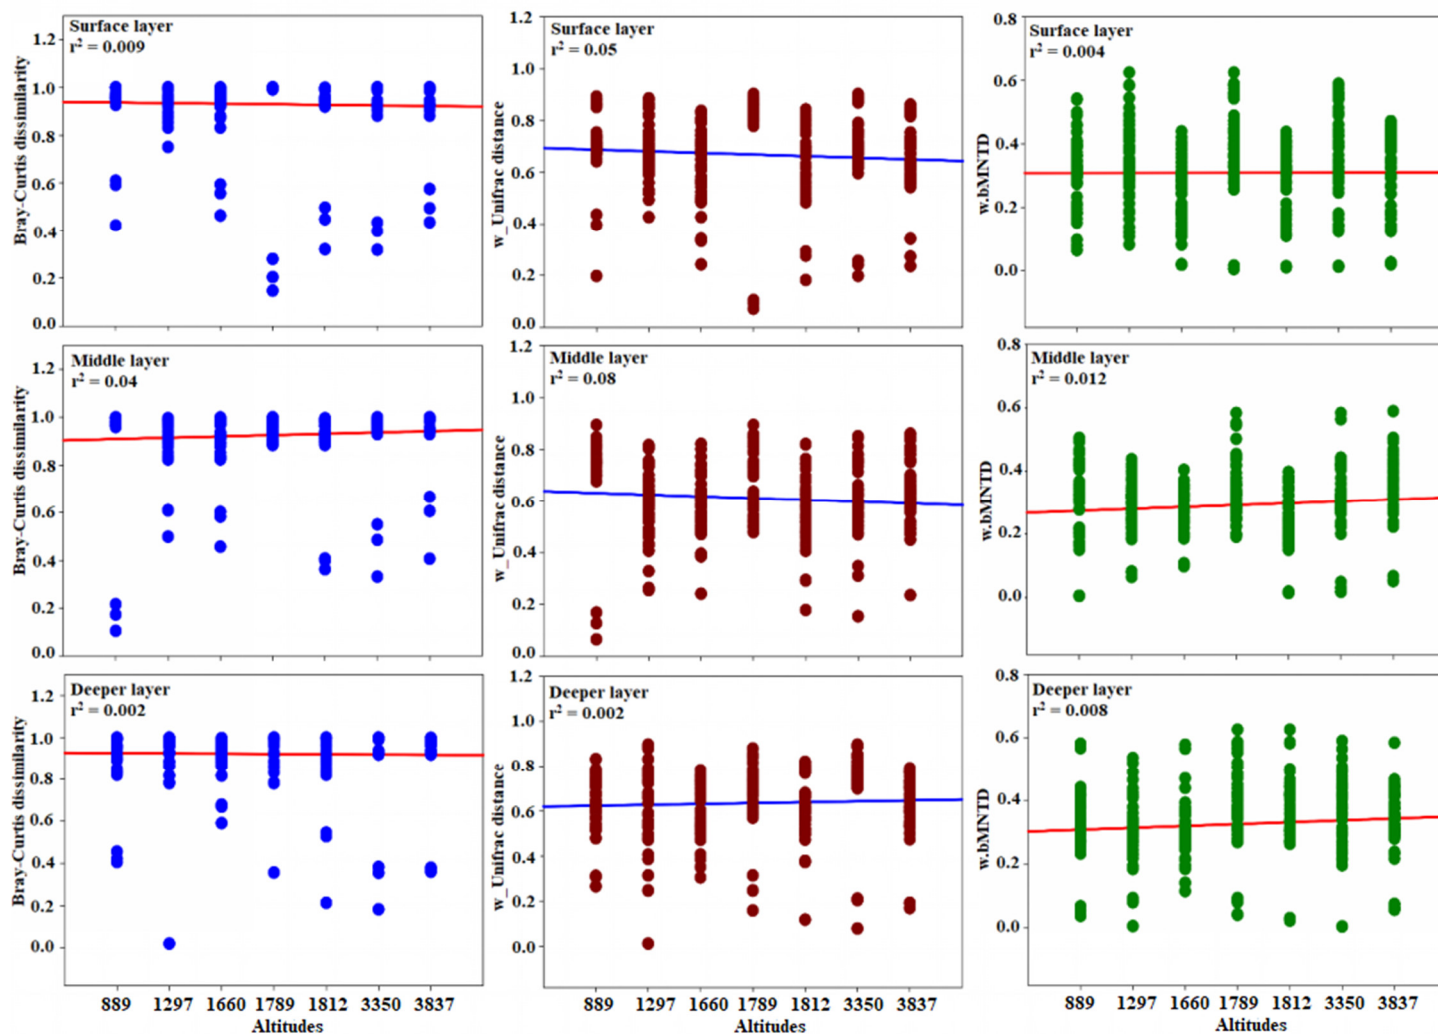

**Figure S6.** Linear regression analysis of fungal taxonomic and phylogenetic beta diversity indices among soil layers and altitudinal gradients.

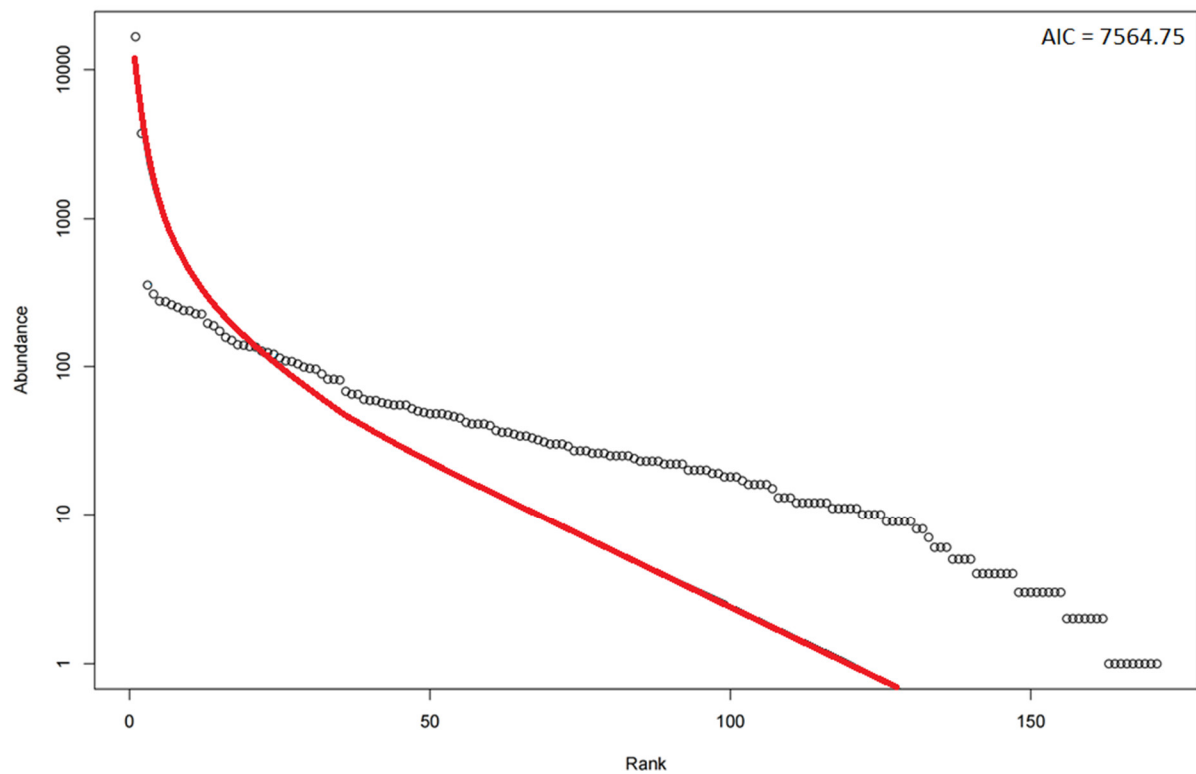

**Figure S7.** The rank abundance distribution lognormal model based on Akaike Information Criterion (AIC). The letters above boxes indicate significant differences between samples (Duncan's test,  $p < 0.05$ ).
